# Supplementary material for: Elite legitimation and delegitimation of international organizations in the media: Patterns and explanations
Source: Springer Nature journal article supplement (doi:10.1007/s11558-018-9320-9), 2018-08-08
Supplement: MOESM1 [file 16021708]

# Online Appendix

## Elite Legitimation and Delegitimation of International Organizations in the Media: Patterns and Explanations

Henning Schmidtke

June 2018

### Table of Contents

|                                                                                                   |    |
|---------------------------------------------------------------------------------------------------|----|
| A1 Text Retrieval and Data Collection Procedure .....                                             | 1  |
| A2 Overview of sampling strategy and results .....                                                | 4  |
| A3 Communication intensity, tone, and patterns of elite legitimacy communication .....            | 7  |
| A3 Communication intensity, tone, and patterns of elite legitimacy communication, continued ..... | 8  |
| A4 Explanatory Variables .....                                                                    | 13 |
| A5 Descriptive Statistics for Explanatory Variables.....                                          | 19 |
| A6 Classification Table .....                                                                     | 20 |
| A7 Diagnostics .....                                                                              | 21 |
| A8 References .....                                                                               | 35 |

## **A1 Text Retrieval and Data Collection Procedure**

The text material was retrieved from electronic newspaper databases in a two-step procedure.

First, we used automated searches that enabled us to focus on articles that were likely to contain evaluations of IO legitimacy. Wherever possible, electronic versions of articles available in the Factiva database (global.factiva.com) were used. For the *Frankfurter Allgemeine Zeitung*, we relied on FAZ-BiblioNet; text material from the 1998 *Tagesanzeiger* – which is not available electronically – could not be included. These routines employed search words related to our legitimization objects. For the EU, for instance, the following routine was used:

(EU OR EC OR E.U. OR E.C. OR (European ADJ1 Union) OR Brussels OR (European ADJ1 communit\*) OR (European ADJ1 (citizens\* OR parliament\* OR council\* or commission or Court OR treaty OR treaties OR institutions))) OR ECJ OR E.C.J.)

It searches for different variations of the IO name and acronym, its headquarters, which is often used as a synonym for the EU, and its main bodies: the European Parliament, the European Commission, the European Council, and the European Court of Justice. We applied the same logic to construct the search routines for the G8 and the UN. The lists of search words were based on extensive pre-tests, which confirmed that including additional search terms would have been inefficient: If these additional terms had been employed, the searches would have yielded exceedingly large numbers of articles, but a very low share of ultimately relevant ones.

In order to manage the amount of potentially relevant text, we applied an intensity sampling procedure and limited the analysis to information-rich periods.<sup>1</sup> We, therefore, considered legitimacy communication around summit events that focus media attention on the

---

<sup>1</sup> Patton (2002) defines this method as a selection of cases that manifest the phenomena of interest intensely.

three IOs examined. For the EU, which has more than one summit per year, we chose the summit with the greatest number of hits using the search routine presented above.

To date, there is no reliable automated procedure for identifying the complex semantic relationships and structures underpinning legitimacy evaluations. Hence, the automated search routines were designed to minimize the number of relevant articles not found by the routines (“false negatives”); as a trade-off, the number of ultimately irrelevant articles produced by the search routines (“false positives”) was still considerable. Therefore, a second, manual step of selecting pertinent articles was necessary. To be included in the final corpus, articles had to contain at least one legitimacy evaluation.

Six members of the research team participated in the manual selection of relevant articles and in the identification and coding of legitimacy evaluations. Reliability was tested for the article selection procedure, for the identification of legitimacy evaluations in articles, and for coding each of the legitimization grammar variables. A random sample of approximately ten percent of the corpus was used for these tests. For all steps of the selection and coding process, we achieved high levels of pairwise intercoder reliability (90 percent and more agreement) and a Krippendorff’s  $\alpha$  of 0.7 or higher. Next, a random sample of articles was assigned to each member of the coding team for identifying and coding legitimacy evaluations; each evaluation considered relevant by the first coder was checked by a second coder and any discrepancies between first and second coder were resolved by two other members of the team who were not involved in the first and second steps – this departs from the standard content-analytical procedure of reliability testing and coding but, in our view, greatly improves data quality. An overview of this sampling design is presented in Table A1 together with the values of the outcome variables. The table thus shows IO summit venues and dates, the sampling period around these dates, the number of coded legitimacy evaluations per IO-country-year (the indicator for legitimization intensity), legitimacy levels (the indicator for tone, the percentage share of positive legitimacy evaluations), and the patterns of elite legitimacy communication

for each IO-country-year, which is derived from the combination of both indicators. For further details on text retrieval and coding procedures, a detailed codebook may be consulted:

[http://www.sfb597.uni-bremen.de/download/en/forschung/B1\\_Codebook.pdf](http://www.sfb597.uni-bremen.de/download/en/forschung/B1_Codebook.pdf)

## A2 Overview of sampling strategy and results

| EU       | Venue    | Date     | Period      | CH        |      |         | DE        |      |         | UK        |      |         | US        |       |         |
|----------|----------|----------|-------------|-----------|------|---------|-----------|------|---------|-----------|------|---------|-----------|-------|---------|
|          |          |          |             | Intensity | Tone | Pattern | Intensity | Tone | Pattern | Intensity | Tone | Pattern | Intensity | Tone  | Pattern |
| 1998     | Vienna   | 11-12/12 | 05-16/12    | 29        | 13.8 | LID     | 57        | 22.8 | HID     | 25        | 28.0 | LIL     | 15        | 20.0  | LID     |
| 1999     | Berlin   | 24-25/03 | 20-31/03    | 52        | 44.2 | HIL     | 161       | 50.3 | HIL     | 115       | 7.0  | HID     | 41        | 17.1  | HID     |
| 2000     | Nice     | 07-10/12 | 02-13/12    | 46        | 28.3 | HIL     | 254       | 20.9 | HID     | 82        | 15.9 | HID     | 39        | 33.3  | HIL     |
| 2001     | Laeken   | 14-15/12 | 08-19/12    | 39        | 15.4 | HID     | 166       | 20.5 | HID     | 134       | 28.4 | HIL     | 15        | 0.0   | LID     |
| 2002     | Seville  | 21-22/06 | 15-26/06    | 29        | 20.7 | LID     | 68        | 16.2 | HID     | 37        | 27.0 | HID     | 11        | 18.2  | LID     |
| 2003     | Brussels | 12-13/12 | 06-17/12    | 60        | 18.3 | HID     | 190       | 20.0 | HID     | 184       | 19.6 | HID     | 22        | 13.6  | LID     |
| 2004     | Brussels | 25-26/03 | 20-31/03    | 18        | 50.0 | LIL     | 83        | 34.9 | HIL     | 16        | 31.3 | LIL     | 12        | 66.7  | LIL     |
| 2005     | Brussels | 16-17/06 | 11-22/06    | 120       | 15.0 | HID     | 276       | 14.5 | HID     | 221       | 11.8 | HID     | 58        | 12.1  | HID     |
| 2006     | Lahti*   | 20/10    | 14-25/10    | 12        | 16.7 | LID     | 66        | 21.2 | HID     | 44        | 25.0 | HID     | 5         | 20.0  | LID     |
| 2007     | Brussels | 21-22/06 | 16-27/06    | 72        | 37.5 | HIL     | 168       | 27.4 | HIL     | 92        | 28.3 | HIL     | 11        | 27.3  | LID     |
| 2008     | Brussels | 19-20/06 | 14-25/06    | 49        | 4.1  | HID     | 119       | 31.9 | HIL     | 57        | 29.8 | HIL     | 21        | 14.3  | LID     |
| 2009     | Brussels | 29-30/10 | 24-04/11    | 12        | 8.3  | LID     | 18        | 22.2 | LID     | 19        | 21.1 | LID     | 0         | 27.3  | LIL     |
| 2010     | Brussels | 07/05    | 01-12/05    | 22        | 31.8 | LIL     | 39        | 15.4 | HID     | 19        | 21.1 | LID     | 13        | 15.4  | LID     |
| 2011     | Brussels | 08-09/12 | 03-14/12    | 39        | 17.9 | HID     | 58        | 20.7 | HID     | 44        | 15.9 | HID     | 6         | 100.0 | LIL     |
| 2012     | Brussels | 28-29/06 | 23/06-04/07 | 0         | 27.3 | LIL     | 22        | 36.4 | LIL     | 0         | 27.3 | LIL     | 0         | 27.3  | LIL     |
| 2013     | Brussels | 27-28/06 | 22/06-03/07 | 19        | 42.1 | LIL     | 33        | 36.4 | LIL     | 52        | 23.1 | HID     | 20        | 25.0  | LID     |
| $\Sigma$ | 3826     |          |             | 618       |      |         | 1778      |      |         | 1141      |      |         | 289       |       |         |

## A2 continued

| Venue |                | Date     | Period      | CH        |      |         | DE        |      |         | GB        |      |         | US        |      |         |
|-------|----------------|----------|-------------|-----------|------|---------|-----------|------|---------|-----------|------|---------|-----------|------|---------|
| G8    |                |          |             | Intensity | Tone | Pattern |
| 1998  | Birmingham     | 15-17/05 | 09-20/05    | 10        | 40.0 | LIL     | 27        | 11.1 | LID     | 28        | 25.0 | LID     | 14        | 42.9 | LIL     |
| 1999  | Cologne        | 18-20/06 | 12-23/06    | 4         | 50.0 | LIL     | 14        | 21.4 | LID     | 7         | 28.6 | LIL     | 0         | 27.3 | LIL     |
| 2000  | Okinawa        | 21-23/07 | 15-26/07    | 8         | 12.5 | LID     | 19        | 21.1 | LID     | 35        | 5.7  | HID     | 10        | 80.0 | LIL     |
| 2001  | Genoa          | 20-22/07 | 14-25/07    | 15        | 13.3 | LID     | 63        | 27.0 | HID     | 61        | 11.5 | HID     | 19        | 5.3  | LID     |
| 2002  | Kananaskis     | 26-27/06 | 22-03/07    | 7         | 0.0  | LID     | 11        | 9.1  | LID     | 29        | 17.2 | LID     | 1         | 0.0  | LID     |
| 2003  | Évian          | 01-03/06 | 28/05-07/06 | 68        | 17.6 | HID     | 42        | 21.4 | HID     | 94        | 11.7 | HID     | 13        | 15.4 | LID     |
| 2004  | Sea Island     | 08-10/06 | 05-16/06    | 6         | 16.7 | LID     | 23        | 17.4 | LID     | 24        | 20.8 | LID     | 2         | 50.0 | LIL     |
| 2005  | Gleneagles     | 06-08/07 | 02-13/07    | 12        | 58.3 | LIL     | 44        | 36.4 | HIL     | 80        | 30.0 | HIL     | 13        | 30.8 | LIL     |
| 2006  | St. Petersburg | 15-17/07 | 08-19/07    | 5         | 40.0 | LIL     | 48        | 27.1 | HID     | 13        | 7.7  | LID     | 10        | 0.0  | LID     |
| 2007  | Heiligendamm   | 06-08/06 | 02-13/06    | 54        | 25.9 | HID     | 201       | 26.4 | HID     | 54        | 13.0 | HID     | 7         | 14.3 | LID     |
| 2008  | Toyako         | 07-09/07 | 05-16/07    | 5         | 0.0  | LID     | 1         | 0.0  | LID     | 53        | 24.5 | HID     | 4         | 0.0  | LID     |
| 2009  | L'Aquila       | 08-10/07 | 04-15/07    | 9         | 11.1 | LID     | 5         | 0.0  | LID     | 50        | 18.0 | HID     | 0         | 27.3 | LIL     |
| 2010  | Huntsville     | 25-26/06 | 19-30/06    | 2         | 0.0  | LID     | 0         | 27.3 | LIL     | 26        | 23.1 | LID     | 0         | 27.3 | LIL     |
| 2011  | Deauville      | 26-27/05 | 21/05-01/06 | 3         | 0.0  | LID     | 3         | 66.7 | LIL     | 8         | 0.0  | LID     | 0         | 27.3 | LIL     |
| 2012  | Camp David     | 18-19/05 | 12-23/05    | 0         | 27.3 | LIL     | 0         | 27.3 | LIL     | 6         | 33.3 | LIL     | 0         | 27.3 | LIL     |
| 2013  | Lough Erne     | 17-18/06 | 15-26/06    | 9         | 33.3 | LIL     | 7         | 14.3 | LID     | 18        | 11.1 | LID     | 0         | 27.3 | LIL     |
| Σ     | 1404           |          |             | 217       |      |         | 508       |      |         | 586       |      |         | 93        |      |         |

## A2 continued

| UN   | Venue | Date        | Period      | CH        |       |         | DE        |      |         | GB        |       |         | US        |      |         |
|------|-------|-------------|-------------|-----------|-------|---------|-----------|------|---------|-----------|-------|---------|-----------|------|---------|
|      |       |             |             | Intensity | Tone  | Pattern | Intensity | Tone | Pattern | Intensity | Tone  | Pattern | Intensity | Tone | Pattern |
| 1998 | NY    | 21/09-02/10 | 21/09-02/10 | 4         | 25.0  | LID     | 15        | 53.3 | LIL     | 4         | 75.0  | LIL     | 15        | 73.3 | LIL     |
| 1999 | NY    | 20/09-02/10 | 20/09-02/10 | 11        | 36.4  | LIL     | 25        | 32.0 | LIL     | 29        | 34.5  | LIL     | 29        | 27.6 | LIL     |
| 2000 | NY    | 12/09-22/09 | 12-22/09    | 2         | 100.0 | LIL     | 3         | 66.7 | LIL     | 1         | 0.0   | LID     | 10        | 30.0 | LIL     |
| 2001 | NY    | 10-16/11    | 08-18/11    | 1         | 100.0 | LIL     | 19        | 47.4 | LIL     | 10        | 0.0   | LID     | 29        | 13.8 | LID     |
| 2002 | NY    | 12-20/09    | 11-21/09    | 45        | 88.9  | HIL     | 25        | 44.0 | LIL     | 56        | 46.4  | HIL     | 46        | 71.7 | HIL     |
| 2003 | NY    | 23/09-02/10 | 23/09-03/10 | 22        | 27.3  | LID     | 42        | 45.2 | HIL     | 50        | 72.0  | HIL     | 55        | 69.1 | HIL     |
| 2004 | NY    | 21-30/09    | 21/09-01/10 | 14        | 21.4  | LID     | 52        | 38.5 | HIL     | 46        | 23.9  | HID     | 23        | 17.4 | LID     |
| 2005 | NY    | 14-19/09    | 14-24/09    | 46        | 10.9  | HID     | 114       | 13.2 | HID     | 84        | 16.7  | HID     | 45        | 26.7 | HID     |
| 2006 | NY    | 19-27/09    | 18-28/09    | 11        | 63.6  | LIL     | 32        | 12.5 | LID     | 26        | 30.8  | LIL     | 31        | 3.2  | LID     |
| 2007 | NY    | 25/09-03/10 | 24/09-04/10 | 15        | 53.3  | LIL     | 20        | 20.0 | LID     | 5         | 40.0  | LIL     | 4         | 25.0 | LID     |
| 2008 | NY    | 23-27/09    | 20/09-01/10 | 6         | 66.7  | LIL     | 15        | 40.0 | LIL     | 1         | 100.0 | LIL     | 17        | 35.3 | LIL     |
| 2009 | NY    | 23-29/09    | 19-30/09    | 20        | 15.0  | LID     | 20        | 25.0 | LID     | 36        | 5.6   | HID     | 21        | 38.1 | LIL     |
| 2010 | NY    | 23-29/09    | 21/09-01/10 | 10        | 40.0  | LIL     | 10        | 30.0 | LIL     | 17        | 17.6  | LID     | 8         | 25.0 | LID     |
| 2011 | NY    | 21-27/09    | 17-28/09    | 2         | 0.0   | LID     | 6         | 0.0  | LID     | 12        | 41.7  | LIL     | 13        | 38.5 | LIL     |
| 2012 | NY    | 25/09-01/10 | 22/09-04/10 | 15        | 20.0  | LID     | 5         | 0.0  | LID     | 16        | 18.8  | LID     | 8         | 0.0  | LID     |
| 2013 | NY    | 24/09-01/10 | 21/09-02/10 | 19        | 52.6  | LIL     | 9         | 0.0  | LID     | 2         | 0.0   | LID     | 24        | 54.2 | LIL     |
| Σ    | 1428  |             |             | 243       |       |         | 412       |      |         | 395       |       |         | 378       |      |         |

\*EU special summit with Russia. LI = legitimation intensity; LT = legitimacy tone. LIL = low-intensity legitimation; HIL = high-intensity legitimation; LID = low-intensity delegitimation; HID = high-intensity delegitimation.

### A3 Communication intensity, tone, and patterns of elite legitimacy communication

|                          |                       | Low-intensity<br>legitimation | Low-intensity<br>delegitimation | High-intensity<br>legitimation | High-intensity<br>delegitimation | Overall      |
|--------------------------|-----------------------|-------------------------------|---------------------------------|--------------------------------|----------------------------------|--------------|
|                          |                       | Intensity≤34.7<br>Tone≥27.3   | Intensity≤34.7<br>Tone<27.3     | Intensity>34.7<br>Tone≥27.3    | Intensity>34.7<br>Tone<27.3      |              |
| All IO-<br>country-years | N (%)                 | 62 (32.3)                     | 68 (35.4)                       | 20 (10.4)                      | 42 (21.9)                        | 192 (100.0)  |
|                          | Ø Intensity (z score) | 10.7 (-0.52)                  | 14.0 (-0.45)                    | 74.7 (0.87)                    | 84.6 (1.08)                      | 34.7 (0.0)   |
|                          | Ø Tone (z score)      | 49.4 (1.03)                   | 12.5 (-0.69)                    | 43.6 (0.76)                    | 17.7 (-0.45)                     | 27.3 (0.0)   |
| EU                       | N (%)                 | 13 (20.3)                     | 16 (25.0)                       | 11 (17.2)                      | 24 (37.5)                        | 64 (100.0)   |
|                          | Ø Intensity (z score) | 13.3 (-0.46)                  | 16.9 (-0.38)                    | 93.0 (1.26)                    | 98.3 (1.38)                      | 59.8 (0.54)  |
|                          | Ø Tone (z score)      | 40.9 (0.95)                   | 17.3 (-0.47)                    | 34.0 (0.31)                    | 17.4 (-0.46)                     | 25.0 (-0.04) |
| G8                       | N (%)                 | 21 (32.8)                     | 29 (45.3)                       | 2 (3.1)                        | 12 (18.8)                        | 64 (100.0)   |
|                          | Ø Intensity (z score) | 4.5 (-0.65)                   | 12.5 (-0.48)                    | 62.0 (0.59)                    | 68.6 (0.73)                      | 21.9 (-0.28) |
|                          | Ø Tone (z score)      | 38.1 (0.95)                   | 9.9 (-0.81)                     | 33.2 (0.27)                    | 19.2 (-0.38)                     | 21.6 (-0.12) |
| UN                       | N (%)                 | 28 (43.8)                     | 23 (35.9)                       | 7 (10.9)                       | 6 (9.4)                          | 64 (100.0)   |
|                          | Ø Intensity (z score) | 14.0 (-0.45)                  | 13.8 (-0.45)                    | 49.4 (0.32)                    | 61.8 (0.59)                      | 22.3 (-0.27) |
|                          | Ø Tone (z score)      | 51.6 (1.14)                   | 12.5 (-0.69)                    | 61.7 (1.61)                    | 16.2 (-0.52)                     | 35.3 (0.37)  |



### A3 Communication intensity, tone, and patterns of elite legitimacy communication, continued

|    |                       | Low-intensity<br>legitimation | Low-intensity<br>delegitimation | High-intensity<br>legitimation | High-intensity<br>delegitimation | Overall      |
|----|-----------------------|-------------------------------|---------------------------------|--------------------------------|----------------------------------|--------------|
| CH | N (%)                 | 18 (37.5)                     | 18 (37.5)                       | 4 (8.3)                        | 8 (16.7)                         | 48 (100.0)   |
|    | Ø Intensity (z score) | 9.7 (-0.54)                   | 11.9 (-0.49)                    | 53.8 (0.41)                    | 59.4 (0.53)                      | 22.5 (-0.26) |
|    | Ø Tone (z score)      | 50.7 (1.21)                   | 12.3 (-0.70)                    | 49.7 (1.05)                    | 15.6 (-0.55)                     | 30.4 (0.19)  |
| DE | N (%)                 | 12 (25.0)                     | 15 (31.3)                       | 7 (14.6)                       | 14 (29.2)                        | 48 (100.0)   |
|    | Ø Intensity (z score) | 14.2 (-0.44)                  | 14.5 (-0.44)                    | 95.6 (1.32)                    | 117.3 (1.79)                     | 56.2 (0.47)  |
|    | Ø Tone (z score)      | 42.3 (0.87)                   | 11.6 (-0.73)                    | 37.8 (0.49)                    | 20.5 (-0.32)                     | 25.7 (-0.03) |
| UK | N (%)                 | 11 (22.9)                     | 14 (29.2)                       | 6 (12.5)                       | 17 (35.4)                        | 48 (100.0)   |
|    | Ø Intensity (z score) | 11.9 (-0.49)                  | 16.4 (-0.39)                    | 78.2 (0.94)                    | 76.0 (0.89)                      | 44.2 (0.21)  |
|    | Ø Tone (z score)      | 42.8 (0.82)                   | 13.1 (-0.66)                    | 39.2 (0.55)                    | 16.2 (-0.52)                     | 24.3 (-0.12) |
| US | N (%)                 | 21 (43.8)                     | 21 (43.8)                       | 3 (6.3)                        | 3 (6.3)                          | 48 (100.0)   |
|    | Ø Intensity (z score) | 8.9 (-0.56)                   | 13.8 (-0.45)                    | 46.7 (0.26)                    | 48.0 (0.29)                      | 14.9 (-0.41) |
|    | Ø Tone (z score)      | 42.2 (1.09)                   | 13.0 (-0.67)                    | 58.1 (1.44)                    | 18.6 (-0.41)                     | 28.9 (0.25)  |

# Explanatory note on patterns of elite legitimacy communication

To operationalize the four patterns of elite legitimacy communication I combine the dimensions of legitimation intensity and tone. For descriptive results on both individual dimensions see the follow figures.

Communication intensity across IOs and countries, 1998-2013 (absolute number of evaluations)

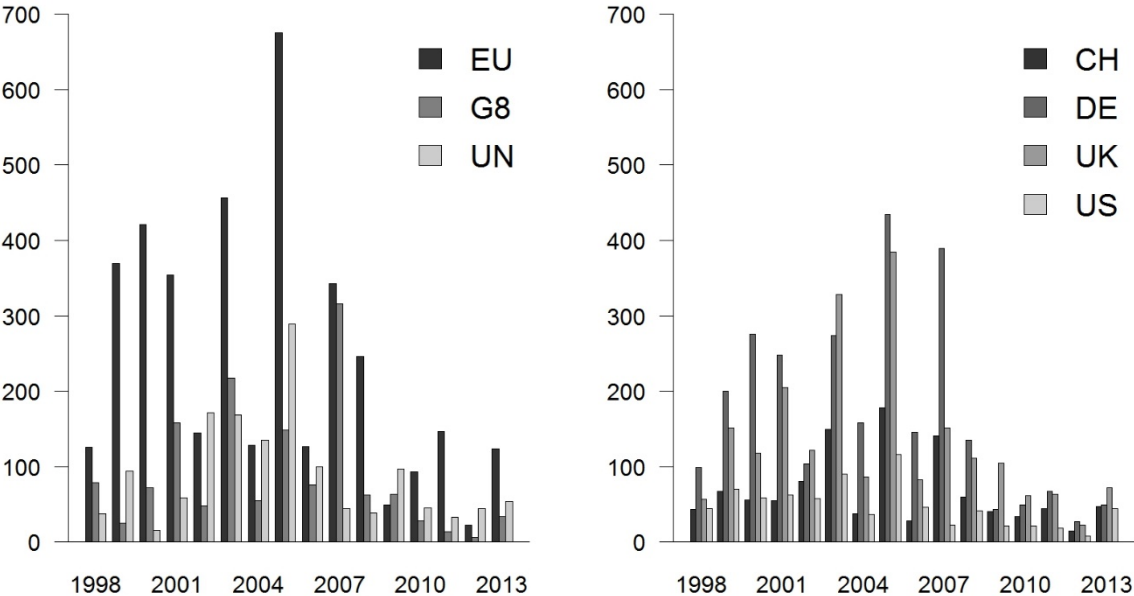

Tone across IOs and countries, 1998-2013 (percent share of positive evaluations)

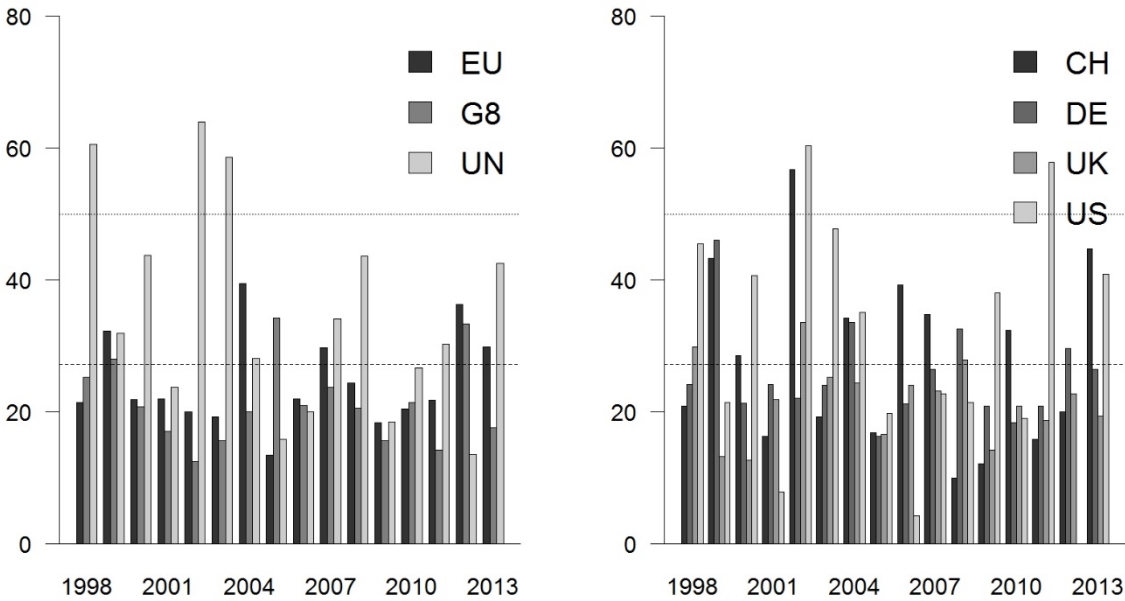

*High-intensity delegitimation* is defined by a communication intensity of more than 34.7 evaluations and a tone of less than 27.3 percent of positive evaluations. The 42 cases in this group have an average communication intensity of 84.6 legitimacy evaluations. This exceeds the overall average by more than one standard deviation. The mean tone (17.7 percent) is about half a standard deviation below the overall average. The pattern is exemplified by British elites’ communication about the 2000 Nice (France) summit in which, under the presidency of Jacques Chirac, a new foundational treaty of the EU – the Treaty of Nice – was finalized. It expanded the scope of qualified majority voting and involved a heated debate about the voting weights of member states (Wessels 2001). In the United Kingdom, there was much opposition to giving up the national veto on taxation and social security issues. Therefore, the summit – which raised fears about a European super-state – triggered 82 legitimacy evaluations and highly elite evaluation with a tone of 15.9 percent positive evaluations.

*High-intensity legitimation* is present, if communication intensity is higher than 34.7 evaluations and if tone exceeds the threshold of 27.3 percent positive evaluations. The 20 cases in this group have an average communication intensity of 74.7 evaluations (almost one standard deviation above the overall average) and a tone of 43.6 percent, corresponding to almost one standard deviation above the overall mean. British elites' evaluations of the UN in the context of the 57<sup>th</sup> UN General Assembly (in 2002) in New York (USA) illustrate this pattern. In his opening address, then-Secretary-General Kofi Annan reminded of the 9/11 attacks and highlighted the need for multilateral cooperation to prevent terrorism. The run-up to the US invasion of Iraq brought up the role of the UN as a "legitimizing-in-chief" of military intervention (Coleman 2007). 56 legitimacy evaluations and a tone of 46.4 percent positive evaluations accompanied the summit.

*Low-intensity delegitimation* results from a communication intensity lower than 34.7 evaluations and a tone of less than 27.3 percent positive evaluations. The average communication intensity of the 68 cases in this group is 14.0 evaluations (half a standard deviation below the overall average) and with an average of 12.5 percent positive evaluations, tone is almost one standard deviation below the overall average. German elites' evaluations on the 2002 G8 summit in Kananaskis (Canada) exemplify the pattern. The summit triggered 11 legitimacy evaluations with predominantly negative tone (9.1 percent positive evaluations).

*Low-intensity legitimation* is defined by a communication intensity lower than 34.7 legitimacy evaluations and a tone of more than 27.3 percent positive evaluations. The 62 cases in this group have an average number of less than eleven legitimacy evaluations (half a standard deviation below the overall average). The mean tone almost reaches 50 percent, more than one standard deviation above the overall mean. A typical example of the pattern is the US elites' evaluation of the 2004 G8 summit hosted by President George W. Bush in Sea Island (USA), which

triggered a mere two legitimacy evaluations (one positive and one negative). The legitimacy of the G8 was no salient issue and there was hardly any explicit contestation. In fact, the articles from which the evaluations are drawn focus on the low turnout of protesters (especially in comparison with the 2003 summit in Évian, France).

## **A4 Explanatory Variables**

### **A4.1 Indicators on IO Authority**

#### *Authority*

I operationalize the authority of IOs with the help of data from Hooghe and colleagues on the pooling and delegation of IO authority at IOs (2017). This dataset provides information on the number of tasks delegated to and the number of decisions pooled at IOs for 76 IOs, including the EU and the UN, from 1950 to 2010. From this dataset, I take the overall level of delegation for a given IO-year and the overall level of pooling for a given IO-year. I sum up both scores to calculate the authority variable. As the G8 – as an informal IO – is not part of the dataset, I set the scores for pooling and delegation to zero. Since there are no tasks formally delegated to the G8 and no decisions formally pooled, the overall level of G8 authority is zero. As the time series by Hooghe and colleagues do not provide data for the most recent years of my observation period, I assume the authority of the EU and the UN to remain constant from 2011 to 2013.

#### *Membership*

I operationalize the membership of sampled countries in the selected IOs with an indicator variable. A score of one indicates that a country is a member of an IO in a given year.

## A4.2 Indicators on national political cultures

To derive indicators of the intensity and tone of national political cultures, I draw on a text corpus of newspaper articles and legitimacy evaluations that focus on the Swiss, German, British, and US political systems in the years 1998-2013. I used the same grammar and coding rules as for the study of legitimacy communication on IOs to identify and code pertinent articles and evaluations. Details on search routines, focusing events, sampling periods, and the coding procedure can be found at [http://www.sfb597.uni-bremen.de/download/en/forschung/B1\\_Codebook.pdf](http://www.sfb597.uni-bremen.de/download/en/forschung/B1_Codebook.pdf). The subsequent table shows the total number of legitimacy evaluations per country identified in the 1998-2013 period (national intensity) and the percentage shares of positive legitimacy evaluations (national tone).

National political cultures. 1998-2013

|           |      | Tone                                                                                                                            |                                                                                                                                   |
|-----------|------|---------------------------------------------------------------------------------------------------------------------------------|-----------------------------------------------------------------------------------------------------------------------------------|
|           |      | Negative                                                                                                                        | Positive                                                                                                                          |
|           |      | <i>High-intensity delegitimation</i>                                                                                            | <i>High-intensity legitimation</i>                                                                                                |
| Intensity | High | <b>United Kingdom</b><br>Intensity: 1601 evaluations<br>Tone: 24.9 percent positive evaluations                                 | <b>United States</b><br>Intensity: 1761 evaluations<br>Tone: 47.0 percent positive evaluations                                    |
|           | Low  | <i>Low-intensity delegitimation</i><br><b>Germany</b><br>Intensity: 1220 evaluations<br>Tone: 37.3 percent positive evaluations | <i>Low-intensity legitimation</i><br><b>Switzerland</b><br>Intensity: 1003 evaluations<br>Tone: 53.5 percent positive evaluations |

Domestic communication intensity and tone across countries, 1998-2013 (absolute number of evaluations and percent share of positive evaluations)

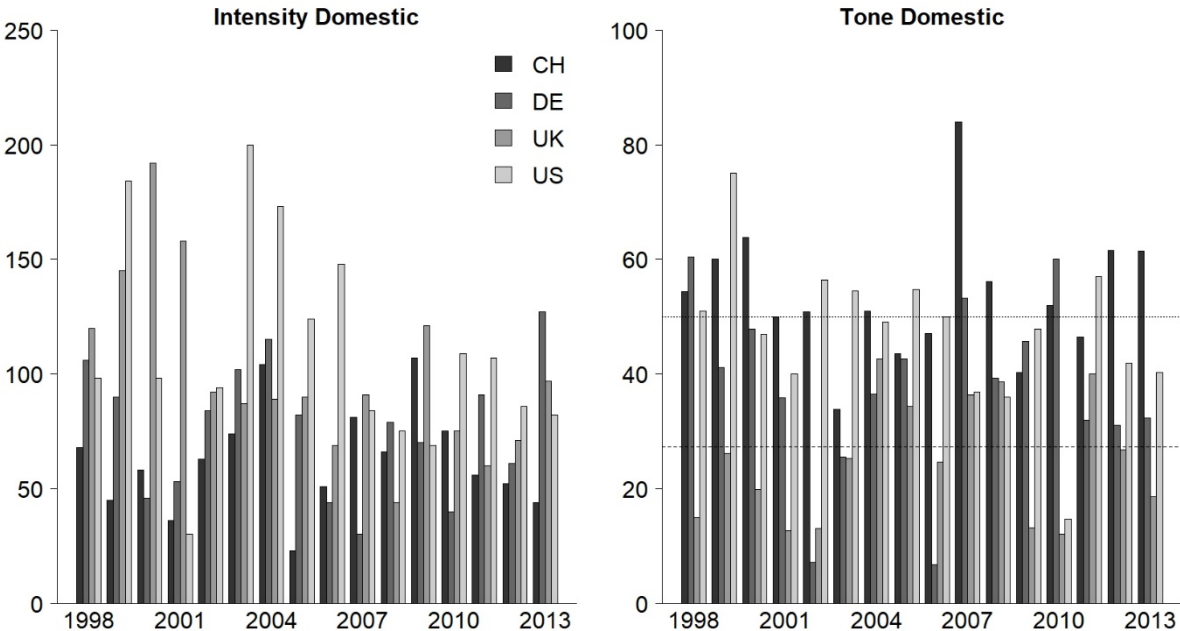

Patterns of elite legitimacy communication on domestic regimes, 1998-2013

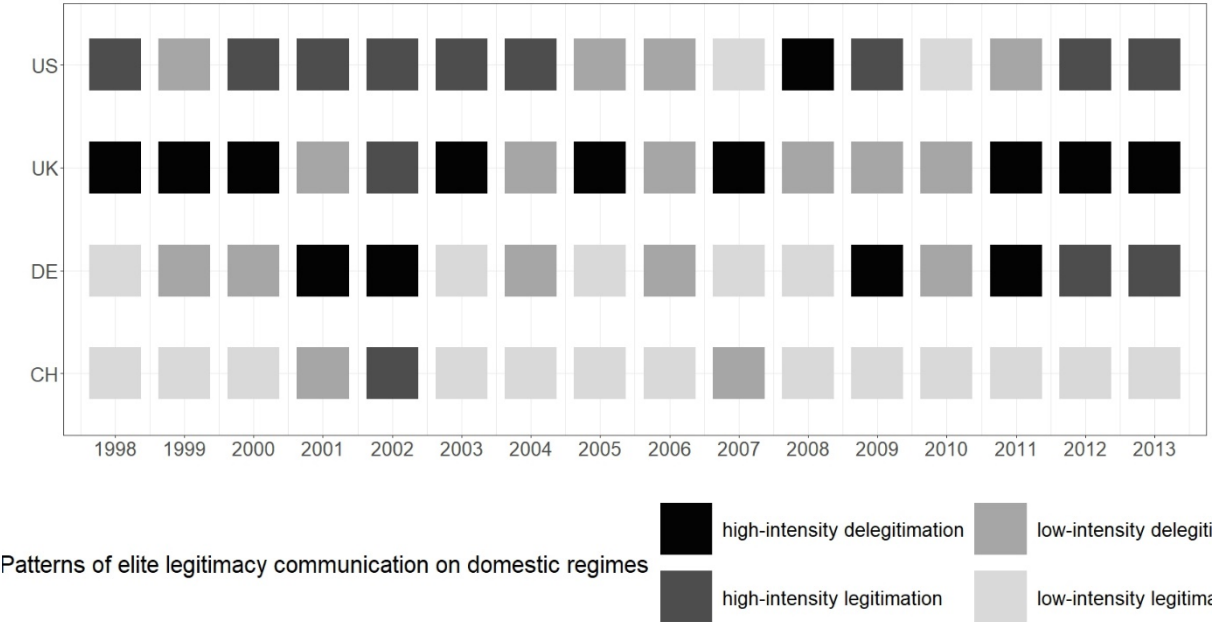

Note: Pattern classification uses overall mean values of national communication intensity (87.3 evaluations) and tone (40.7 percent positive evaluations).



### **A4.3 Political events variables**

The fine-grained coding schemes presented here were used to code the event contexts and speaker types of each legitimacy evaluation. For the purposes of the empirical analysis, broader categories – as shown in the tables – were used: three event contexts (domestic, security, and institutional) and three speaker types (journalists, government actors, and civil society) were coded. The coding of event contexts was done on the basis of the dominant context identified by the coder in the paragraph in which the legitimacy evaluation was embedded. The explanatory variables derived from the three event contexts and three speaker types are presented as the respective percentage shares in a given IO-country-year.

## Classification of event contexts

| Event context       | Specific event categories                                                                                                                                                                                                                                                                                                                                                                      |
|---------------------|------------------------------------------------------------------------------------------------------------------------------------------------------------------------------------------------------------------------------------------------------------------------------------------------------------------------------------------------------------------------------------------------|
|                     | Foreign policy (general)                                                                                                                                                                                                                                                                                                                                                                       |
| Security event      | Security and defense policy<br>Public security policy<br>International crime<br>Other security and defense issues                                                                                                                                                                                                                                                                              |
| Institutional event | Institutional design (general)<br>Territorial organization/membership<br>Executive and administrative processes<br>Legislative processes<br>Judicial and constitutional processes<br>Electoral processes<br>Budgeting<br>Other intuitional issues                                                                                                                                              |
| Domestic event      | Fiscal and economic policy (general)<br>Monetary policy<br>Financial market policy<br>Trade policy<br>Industrial, regional, structural policy<br>Debt policy<br>Agricultural policy<br>Energy policy<br>Consumer protection policy<br>Infrastructural policy<br>Other economic issues<br>Environmental policy<br>Educational, research and cultural policy<br>Social policy<br>Domestic policy |

Classification of elite speakers

| Speaker types                           | Specific speaker categories                 |
|-----------------------------------------|---------------------------------------------|
| Government speakers                     | Government, administration                  |
|                                         | Head of state/government                    |
|                                         | Minister/cabinet member                     |
|                                         | Military                                    |
|                                         | Judiciary                                   |
|                                         | Other holder of a national political office |
|                                         | Parliamentarians, government party          |
|                                         | Parliamentarians, opposition party          |
|                                         | Member of government/majority party         |
|                                         | Member of opposition/minority party         |
|                                         | Other party members                         |
|                                         | European Union representatives              |
|                                         | G8 representatives                          |
| United Nations representatives          |                                             |
| Other (inter-)national political actors |                                             |
| Civil society speakers                  | NGOs                                        |
|                                         | Unions                                      |
|                                         | Business associations                       |
|                                         | Other interest group representatives        |
|                                         | Academia                                    |
|                                         | Arts/Culture                                |
|                                         | Religious groups                            |
|                                         | Citizens/the people                         |
|                                         | Protesters                                  |
| Other civil society actors              |                                             |
| Journalists                             |                                             |

## A5 Descriptive Statistics for Explanatory Variables

| Variable             | N   | Min | Max   | Mean | SD   |
|----------------------|-----|-----|-------|------|------|
| Government speakers  | 192 | 0.0 | 100.0 | 31.9 | 26.0 |
| Security events      | 192 | 0.0 | 100.0 | 25.7 | 28.1 |
| Institutional events | 192 | 0.0 | 100.0 | 43.0 | 28.9 |
| Authority            | 192 | 0.0 | 0.92  | 0.52 | 0.38 |
| National intensity   | 192 | 23  | 200   | 87.3 | 38.8 |
| National tone        | 192 | 6.8 | 84.0  | 40.7 | 16.5 |
| Membership           | 192 | 0   | 1     | 0.73 | 0.45 |

## A6 Classification Table

| Observed                      | Predicted                  |                              |                             |                               | % correct |  |
|-------------------------------|----------------------------|------------------------------|-----------------------------|-------------------------------|-----------|--|
|                               | Low-intensity legitimation | Low-intensity delegitimation | High-intensity legitimation | High-intensity delegitimation |           |  |
| Model 1                       |                            |                              |                             |                               |           |  |
| Low-intensity legitimation    | 45                         | 13                           | 0                           | 4                             | 72.6      |  |
| Low-intensity delegitimation  | 13                         | 44                           | 1                           | 10                            | 64.7      |  |
| High-intensity legitimation   | 6                          | 6                            | 1                           | 7                             | 5.0       |  |
| High-intensity delegitimation | 3                          | 15                           | 0                           | 24                            | 57.1      |  |
| % overall                     | 34.9                       | 40.6                         | 1.0                         | 24.0                          | 59.4      |  |

## A7 Diagnostics

### A7.1 Multicollinearity Statistics

| Variable             | Tolerance | Variance Inflation Factor (VIF) |
|----------------------|-----------|---------------------------------|
| Government speakers  | 0.641     | 1.559                           |
| Security events      | 0.488     | 2.01                            |
| Institutional events | 0.523     | 1.912                           |
| Authority            | 0.748     | 1.338                           |
| National intensity   | 0.446     | 2.245                           |
| National tone        | 0.456     | 2.194                           |
| Membership           | 0.750     | 1.333                           |

Dependent variable patterns of elite legitimacy communication

### A7.2 Hausman Test

I ran the Hausman test (Hausman and McFadden 1984) on the full dataset. The  $p$ -values for Chi-Square statistics, comparing the vectors of coefficients for each pattern of elite legitimacy communication across the full model and restricted models, are:

| Restricted Models                     | Full Model |
|---------------------------------------|------------|
| Exclude High-intensity delegitimation | NA         |
| Exclude High-intensity legitimation   | 0.9999     |
| Exclude Low-intensity delegitimation  | NA         |
| Exclude Low-intensity legitimation    | baseline   |

### A7.4 Robustness Checks

The following tables present robustness checks. For comparison, I list regression coefficients and standard errors in brackets. \* $p < 0.1$ ; \*\* $p < 0.05$ ; \*\*\* $p < 0.01$

Full Model as presented in the paper

|                                | High-intensity<br>legitimation | Low-intensity<br>delegitimation | High-intensity<br>delegitimation |
|--------------------------------|--------------------------------|---------------------------------|----------------------------------|
| Authority                      | 1.138***<br>(0.441)            | 0.434*<br>(0.245)               | 0.842***<br>(0.293)              |
| Membership                     | 1.614**<br>(0.802)             | 0.449<br>(0.540)                | 1.635**<br>(0.664)               |
| National intensity             | 0.327<br>(0.452)               | 0.359<br>(0.343)                | 0.327<br>(0.382)                 |
| National tone                  | -0.187<br>(0.421)              | -0.378<br>(0.325)               | -0.541<br>(0.398)                |
| Security event                 | 0.260<br>(0.477)               | -0.211<br>(0.287)               | -0.921**<br>(0.437)              |
| Institutional event            | 1.277**<br>(0.503)             | 0.380<br>(0.309)                | 0.923***<br>(0.309)              |
| Government speakers            | -0.645*<br>(0.356)             | -1.311***<br>(0.292)            | -1.344***<br>(0.375)             |
| -2 LL                          | 393.76                         |                                 |                                  |
| Chi <sup>2</sup>               | 105.71                         |                                 |                                  |
| N                              | 192                            |                                 |                                  |
| McFadden pseudo-R <sup>2</sup> | 0.212                          |                                 |                                  |

For the full model, mean values of legitimation intensity and tone were chosen as cutoff points for classifying elite communication into the four patters. As this procedure is prone to outlier bias, the following table presents the full model with legitimation communication patterns classified on the basis of median communication intensity and tone.

Full Model with median communication intensity (19) and tone (22.2) as cutoff points for pattern classification

|                                | High-intensity<br>legitimation | Low-intensity<br>delegitimation | High-intensity<br>delegitimation |
|--------------------------------|--------------------------------|---------------------------------|----------------------------------|
| Authority                      | 0.962***<br>(0.293)            | 0.505*<br>(0.279)               | 1.145***<br>(0.305)              |
| Membership                     | 1.966***<br>(0.648)            | 0.569<br>(0.608)                | 1.574**<br>(0.660)               |
| National intensity             | 0.467<br>(0.381)               | 0.564<br>(0.396)                | 0.620<br>(0.404)                 |
| National tone                  | -0.304<br>(0.344)              | -0.502<br>(0.383)               | -0.458<br>(0.388)                |
| Security event                 | -0.072<br>(0.332)              | -0.133<br>(0.323)               | -0.482<br>(0.397)                |
| Institutional event            | 0.762**<br>(0.353)             | 0.273<br>(0.329)                | 0.955***<br>(0.365)              |
| Government speakers            | -0.729**<br>(0.287)            | -1.814***<br>(0.386)            | -1.428***<br>(0.370)             |
| -2 LL                          | 417.4                          |                                 |                                  |
| Chi <sup>2</sup>               | 113.02                         |                                 |                                  |
| N                              | 192                            |                                 |                                  |
| McFadden pseudo-R <sup>2</sup> | 0.213                          |                                 |                                  |



The full model presented in the paper builds on clustered data as legitimacy communication patterns are grouped according to IOs and countries. To probe the robustness of the results, the following table presents multinomial logistic regression coefficients for the model with robust, clustered standard errors for the IO level.

Full Model with robust, clustered standard errors for the IO level.

|                                | High-intensity<br>legitimation | Low-intensity<br>delegitimation | High-intensity<br>delegitimation |
|--------------------------------|--------------------------------|---------------------------------|----------------------------------|
| Authority                      | 1.138***<br>(0.155)            | 0.434<br>(0.363)                | 0.842***<br>(0.111)              |
| Membership                     | 1.614***<br>(0.584)            | 0.449<br>(0.413)                | 1.635***<br>(0.308)              |
| National intensity             | 0.327<br>(0.908)               | 0.359*<br>(0.166)               | 0.327<br>(0.544)                 |
| National tone                  | -0.187<br>(0.612)              | -0.378**<br>(0.122)             | -0.541<br>(0.742)                |
| Security event                 | 0.261<br>(0.639)               | -0.211<br>(0.438)               | -0.921**<br>(0.390)              |
| Institutional event            | 1.277**<br>(0.498)             | 0.380<br>(0.306)                | 0.923***<br>(0.088)              |
| Government speakers            | -0.645<br>(0.467)              | -1.311***<br>(0.319)            | -1.344***<br>(0.087)             |
| -2 LL                          | 417.4                          |                                 |                                  |
| Chi <sup>2</sup>               | 113.02                         |                                 |                                  |
| N                              | 192                            |                                 |                                  |
| McFadden pseudo-R <sup>2</sup> | 0.213                          |                                 |                                  |

The full model presented in the paper builds on cluster data as legitimacy communication patterns are grouped according to IOs and countries. To probe the robustness of results, the following table presents multinomial logistic regression coefficients for the model with robust, clustered standard errors for the country level.

Full Model with robust, clustered standard errors for the country level.

|                                | High-intensity<br>legitimation | Low-intensity<br>delegitimation | High-intensity<br>delegitimation |
|--------------------------------|--------------------------------|---------------------------------|----------------------------------|
| Authority                      | 1.138**<br>(0.467)             | 0.434<br>(0.326)                | 0.842**<br>(0.367)               |
| Membership                     | 1.614***<br>(0.191)            | 0.449<br>(0.285)                | 1.635***<br>(0.277)              |
| National intensity             | 0.327*<br>(0.176)              | 0.359*<br>(0.216)               | 0.327***<br>(0.042)              |
| National tone                  | -0.187<br>(0.127)              | -0.378***<br>(0.095)            | -0.541*<br>(0.312)               |
| Security event                 | 0.261<br>(0.364)               | -0.211<br>(0.469)               | -0.921<br>(0.601)                |
| Institutional event            | 1.277***<br>(0.272)            | 0.380<br>(0.262)                | 0.923***<br>(0.150)              |
| Government speakers            | -0.645***<br>(0.149)           | -1.311**<br>(0.640)             | -1.344***<br>(0.092)             |
| -2 LL                          | 417.4                          |                                 |                                  |
| Chi <sup>2</sup>               | 113.02                         |                                 |                                  |
| N                              | 192                            |                                 |                                  |
| McFadden pseudo-R <sup>2</sup> | 0.213                          |                                 |                                  |

The full model presented in the paper could be prone to secular trends. To probe the robustness of my results the following table presents multinomial logistic regression coefficients for the full model based on data for the period 1998-2005. The subsequent table shows multinomial logistic regression coefficients for the full model based on data for the period 2006-2013.

Full Model, 1998-2005.

|                                | High-intensity<br>legitimation | Low-intensity<br>delegitimation | High-intensity<br>delegitimation |
|--------------------------------|--------------------------------|---------------------------------|----------------------------------|
| Authority                      | 1.021*<br>(0.573)              | 0.560<br>(0.426)                | 1.484***<br>(0.488)              |
| Membership                     | 1.546<br>(1.054)               | 0.862<br>(0.913)                | 2.510**<br>(1.034)               |
| National intensity             | 0.365<br>(0.505)               | -0.116<br>(0.460)               | 0.055<br>(0.493)                 |
| National tone                  | -0.394<br>(0.458)              | 0.079<br>(0.432)                | -0.336<br>(0.499)                |
| Security event                 | 0.428<br>(0.595)               | 0.234<br>(0.490)                | 0.039<br>(0.619)                 |
| Institutional event            | 1.366*<br>(0.697)              | 1.201**<br>(0.549)              | 2.164***<br>(0.655)              |
| Government speakers            | -0.265<br>(0.473)              | -2.011***<br>(0.619)            | -1.799***<br>(0.600)             |
| -2 LL                          | 190.134                        |                                 |                                  |
| Chi <sup>2</sup>               | 70.98                          |                                 |                                  |
| N                              | 96                             |                                 |                                  |
| McFadden pseudo-R <sup>2</sup> | 0.272                          |                                 |                                  |

Full Model, 2006-2013.

|                                | High-intensity<br>legitimation | Low-intensity<br>delegitimation | High-intensity<br>delegitimation |
|--------------------------------|--------------------------------|---------------------------------|----------------------------------|
| Authority                      | 74.414<br>(13008.542)          | 0.537<br>(0.345)                | 0.473<br>(0.466)                 |
| Membership                     | 236.259<br>(25904.945)         | 0.853<br>(0.816)                | 1.993*<br>(1.149)                |
| National intensity             | -109.740<br>(14702.095)        | 0.977*<br>(0.582)               | 0.220<br>(0.757)                 |
| National tone                  | 185.160<br>(20547.132)         | -0.589<br>0.585                 | -1.031<br>(0.895)                |
| Security event                 | -29.199<br>(9472.457)          | -0.680<br>(0.423)               | -2.497***<br>(0.931)             |
| Institutional event            | 75.959<br>(8552.946)           | -0.183<br>(0.445)               | 0.273<br>(0.562)                 |
| Government speakers            | -126.985<br>(14361.505)        | -1.260***<br>(0.395)            | -1.494**<br>(0.661)              |
| -2 LL                          | 129.97                         |                                 |                                  |
| Chi <sup>2</sup>               | 95.926                         |                                 |                                  |
| N                              | 96                             |                                 |                                  |
| McFadden pseudo-R <sup>2</sup> | 0.425                          |                                 |                                  |

The model presented in the paper might also be spatially biased. To probe this effect, the following tables provide jackknife estimates

Full Model, excluding the European Union

|                                | High-intensity<br>legitimation | Low-intensity<br>delegitimation | High-intensity<br>delegitimation |
|--------------------------------|--------------------------------|---------------------------------|----------------------------------|
| Authority                      | 0.236<br>(0.677)               | 1.330***<br>(0.461)             | 1.076*<br>(0.605)                |
| Membership                     | 16.375<br>(2460.366)           | 0.313<br>(0.748)                | 1.145<br>(1.074)                 |
| National intensity             | 1.262*<br>(0.645)              | 0.516<br>(0.438)                | 0.944<br>(0.517)                 |
| National tone                  | -0.892<br>(0.571)              | -0.575<br>(0.425)               | -1.391**<br>(0.586)              |
| Security event                 | 0.818<br>(0.792)               | -0.774**<br>(0.377)             | -1.002<br>(0.611)                |
| Institutional event            | 1.499*<br>(0.890)              | 0.273<br>(0.353)                | 1.097**<br>(0.475)               |
| Government speakers            | 0.158<br>(0.540)               | -1.581***<br>(0.372)            | -1.380***<br>(0.521)             |
| -2 LL                          | 229.18                         |                                 |                                  |
| Chi <sup>2</sup>               | 77.014                         |                                 |                                  |
| N                              | 128                            |                                 |                                  |
| McFadden pseudo-R <sup>2</sup> | 0.252                          |                                 |                                  |

Full Model, excluding the G8

|                                | High-intensity<br>legitimation | Low-intensity<br>delegitimation | High-intensity<br>delegitimation |
|--------------------------------|--------------------------------|---------------------------------|----------------------------------|
| Authority                      | 1.415<br>(2.061)               | -4.723**<br>(1.900)             | -1.122<br>(1.944)                |
| Membership                     | 1.213<br>(0.937)               | -0.896<br>(0.814)               | 1.383<br>(0.845)                 |
| National intensity             | 0.240<br>(0.516)               | 0.509<br>(0.431)                | 0.020<br>(0.467)                 |
| National tone                  | -0.053<br>(0.480)              | -0.513<br>(0.423)               | 0.019<br>(0.475)                 |
| Security event                 | 1.068<br>(0.699)               | -0.305<br>(0.483)               | -0.882<br>(0.616)                |
| Institutional event            | 1.896***<br>(0.691)            | 0.666<br>(0.484)                | 0.806<br>(0.507)                 |
| Government speakers            | -0.506<br>(0.419)              | -1.413***<br>(0.380)            | -1.579***<br>(0.478)             |
| -2 LL                          | 264.54                         |                                 |                                  |
| Chi <sup>2</sup>               | 79.188                         |                                 |                                  |
| N                              | 128                            |                                 |                                  |
| McFadden pseudo-R <sup>2</sup> | 0.230                          |                                 |                                  |

Full Model, excluding the United Nations

|                                | High-intensity<br>legitimation | Low-intensity<br>delegitimation | High-intensity<br>delegitimation |
|--------------------------------|--------------------------------|---------------------------------|----------------------------------|
| Authority                      | 1.029**<br>(0.476)             | 0.125<br>(0.343)                | 0.598*<br>(0.356)                |
| Membership                     | 1.663<br>(1.026)               | -0.536<br>(0.808)               | 1.137<br>(0.853)                 |
| National intensity             | -0.455<br>(0.489)              | 0.336<br>(0.518)                | 0.115<br>(0.524)                 |
| National tone                  | 0.213<br>(0.626)               | -0.455<br>(0.489)               | -0.523<br>(0.524)                |
| Security event                 | -0.816<br>(1.129)              | -1.538**<br>(0.609)             | -2.124**<br>(0.922)              |
| Institutional event            | 1.141*<br>(0.607)              | 0.180<br>(0.425)                | 0.868*<br>(0.461)                |
| Government speakers            | -1.301*<br>(0.697)             | -2.013***<br>(0.556)            | -1.563***<br>(0.555)             |
| -2 LL                          | 239.98                         |                                 |                                  |
| Chi <sup>2</sup>               | 95.045                         |                                 |                                  |
| N                              | 128                            |                                 |                                  |
| McFadden pseudo-R <sup>2</sup> | 0.284                          |                                 |                                  |

Full Model, excluding Switzerland

|                                | High-intensity<br>legitimation | Low-intensity<br>delegitimation | High-intensity<br>delegitimation |
|--------------------------------|--------------------------------|---------------------------------|----------------------------------|
| Authority                      | 0.860*<br>(0.477)              | 0.320<br>(0.334)                | 0.721**<br>(0.354)               |
| Membership                     | 1.776<br>(1.460)               | -0.584<br>(0.995)               | 1.672<br>(1.208)                 |
| National intensity             | 0.384<br>(0.483)               | 0.125<br>(0.397)                | 0.313<br>(0.406)                 |
| National tone                  | -0.231<br>(0.444)              | -0.401<br>(0.381)               | -0.413<br>(0.411)                |
| Security event                 | 0.631<br>(0.552)               | 0.495<br>(0.387)                | -0.462<br>(0.487)                |
| Institutional event            | 1.533**<br>(0.621)             | 0.683<br>(0.424)                | 1.028**<br>(0.450)               |
| Government speakers            | -0.774<br>(0.534)              | -2.270***<br>(0.463)            | -1.502***<br>(0.505)             |
| -2 LL                          | 282.02                         |                                 |                                  |
| Chi <sup>2</sup>               | 96.564                         |                                 |                                  |
| N                              | 144                            |                                 |                                  |
| McFadden pseudo-R <sup>2</sup> | 0.255                          |                                 |                                  |



Full Model, excluding Germany

|                                | High-intensity<br>legitimation | Low-intensity<br>delegitimation | High-intensity<br>delegitimation |
|--------------------------------|--------------------------------|---------------------------------|----------------------------------|
| Authority                      | 1.280**<br>(0.608)             | 0.513*<br>(0.274)               | 0.878***<br>(0.340)              |
| Membership                     | 1.445<br>(0.950)               | 0.394<br>(0.622)                | 1.705**<br>(0.796)               |
| National intensity             | 0.272<br>(0.529)               | 0.374<br>(0.379)                | 0.339<br>(0.433)                 |
| National tone                  | -0.242<br>(0.481)              | -0.431<br>(0.344)               | -0.489<br>(0.422)                |
| Security event                 | 0.451<br>(0.583)               | -0.295<br>(0.323)               | -0.642<br>(0.478)                |
| Institutional event            | 1.312**<br>(0.623)             | 0.264<br>(0.356)                | 0.986**<br>(0.442)               |
| Government speakers            | -0.531<br>(0.384)              | -1.059***<br>(0.297)            | -1.326***<br>(0.409)             |
| -2 LL                          | 294.44                         |                                 |                                  |
| Chi <sup>2</sup>               | 71.527                         |                                 |                                  |
| N                              | 144                            |                                 |                                  |
| McFadden pseudo-R <sup>2</sup> | 0.195                          |                                 |                                  |

Full Model, excluding the United Kingdom

|                                | High-intensity<br>legitimation | Low-intensity<br>delegitimation | High-intensity<br>delegitimation |
|--------------------------------|--------------------------------|---------------------------------|----------------------------------|
| Authority                      | 1.573**<br>(0.628)             | 0.614**<br>(0.287)              | 1.235***<br>(0.393)              |
| Membership                     | 1.737*<br>(0.895)              | 0.647<br>(0.590)                | 2.010***<br>(0.772)              |
| National intensity             | 0.293<br>(0.708)               | 0.716<br>(0.500)                | -0.304<br>(0.679)                |
| National tone                  | -0.027<br>(0.627)              | -0.586<br>(0.467)               | 0.069<br>(0.636)                 |
| Security event                 | 0.113<br>(0.635)               | -0.454<br>(0.347)               | -1.586**<br>(0.710)              |
| Institutional event            | 1.348**<br>(0.616)             | 0.443<br>(0.339)                | 1.109**<br>(0.436)               |
| Government speakers            | -0.726*<br>(0.418)             | -1.351***<br>(0.336)            | -1.546***<br>(0.478)             |
| -2 LL                          | 271.34                         |                                 |                                  |
| Chi <sup>2</sup>               | 93.263                         |                                 |                                  |
| N                              | 144                            |                                 |                                  |
| McFadden pseudo-R <sup>2</sup> | 0.256                          |                                 |                                  |

Full Model, excluding the United States

|                                | High-intensity<br>legitimation | Low-intensity<br>delegitimation | High-intensity<br>delegitimation |
|--------------------------------|--------------------------------|---------------------------------|----------------------------------|
| Authority                      | 0.865*<br>(0.461)              | 0.041<br>(0.294)                | 0.546*<br>(0.329)                |
| Membership                     | 1.521*<br>(0.894)              | 0.703<br>(0.666)                | 1.460*<br>(0.760)                |
| National intensity             | 0.232<br>(0.502)               | 0.299<br>(0.405)                | 0.324<br>(0.430)                 |
| National tone                  | 0.006<br>(0.599)               | -0.334<br>(0.497)               | -0.987*<br>(0.582)               |
| Security event                 | 0.040<br>(0.516)               | -0.388<br>(0.337)               | -1.189**<br>(0.504)              |
| Institutional event            | 1.067**<br>(0.537)             | 0.229<br>(0.355)                | 0.785*<br>(0.403)                |
| Government speakers            | -0.734*<br>(0.404)             | -0.994***<br>(0.334)            | -1.325***<br>(0.430)             |
| -2 LL                          | 304.14                         |                                 |                                  |
| Chi <sup>2</sup>               | 78.651                         |                                 |                                  |
| N                              | 144                            |                                 |                                  |
| McFadden pseudo-R <sup>2</sup> | 0.205                          |                                 |                                  |

## A8 References

- Coleman, K. P. (2007). *International Legitimacy and Peace Enforcement. The Politics of International Legitimacy*. Cambridge: Cambridge University Press.
- Hausman, J., & McFadden, D. (1984). Specification Tests for the Multinomial Logit Model. *Econometrica*, 52(5), 1219–1240. doi:10.2307/1910997.
- Hooghe, L., Marks, G., Lenz, T., Bezuijen, J., Ceka, B., & Derderyan, S. (2017). *Measuring International Authority. A Postfunctionalist Theory of Governance, Volume III*. Oxford: Oxford University Press.
- Patton, M. Q. (2002). *Qualitative Research and Evaluation Methods*. Thousand Oaks: Sage.
- Wessels, W. (2001). Nice Results: The Millennium IGC in the EU's Evolution. *Journal of Common Market Studies*, 39(2), 197–219. doi:10.1111/1468-5965.00285
